# Supplementary material for: Identification and Validation of N6-methyladenosine-related Biomarkers for Bladder Cancer: Implications for Immunotherapy
Source: Research Square preprint supplement (doi:10.21203/rs.3.rs-1101509/v1), 2021-12-06

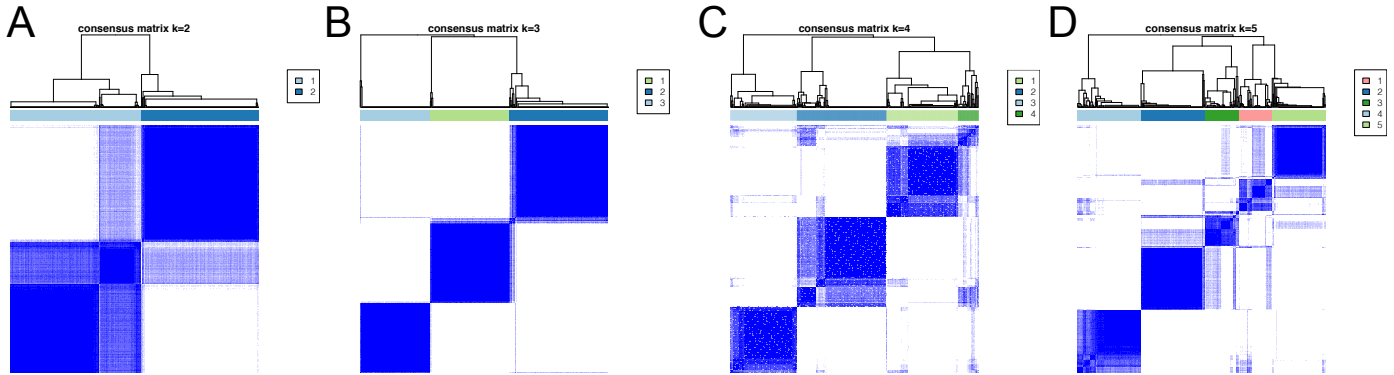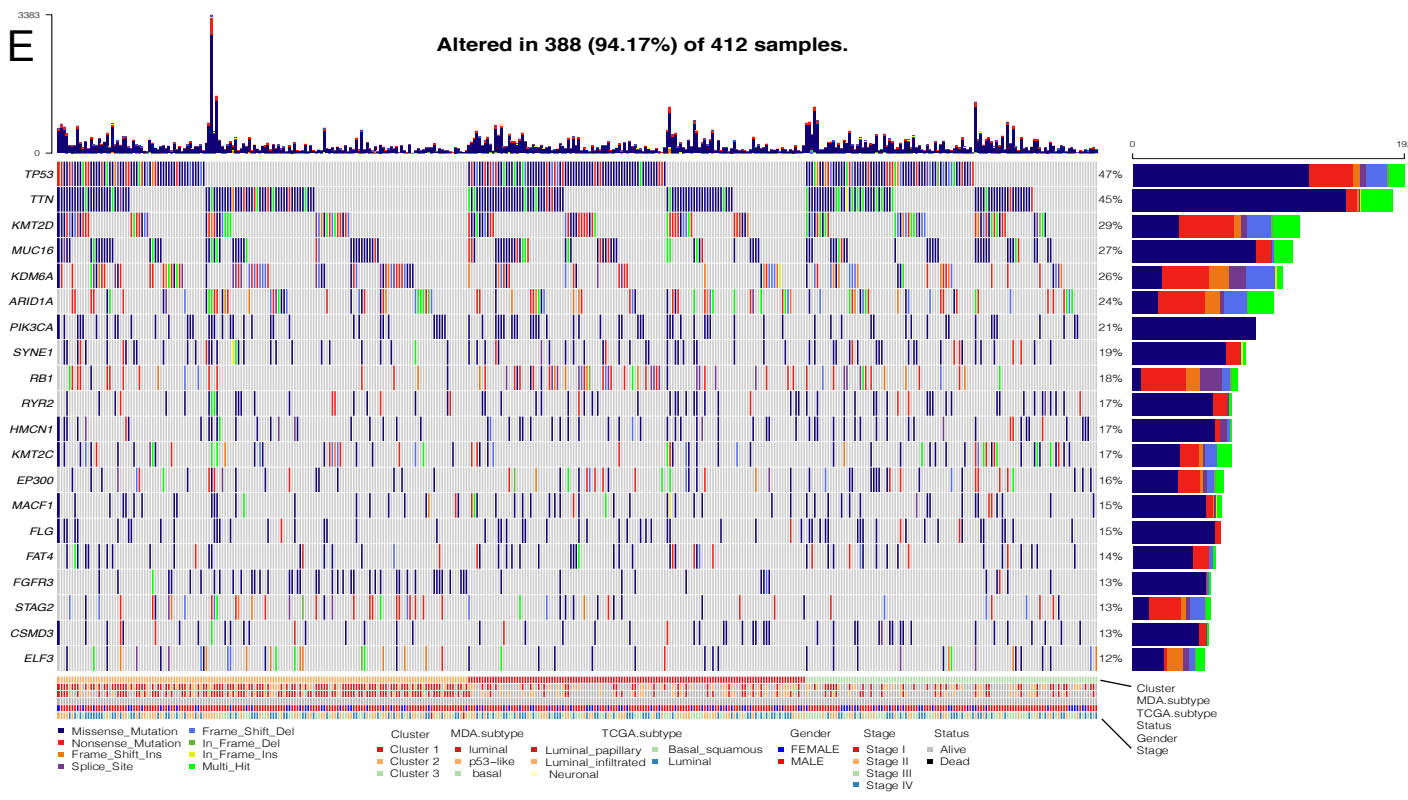

**A****Amplification**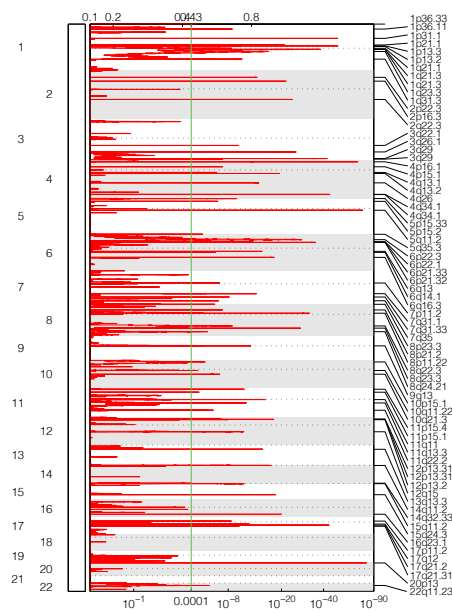**Cluster 1**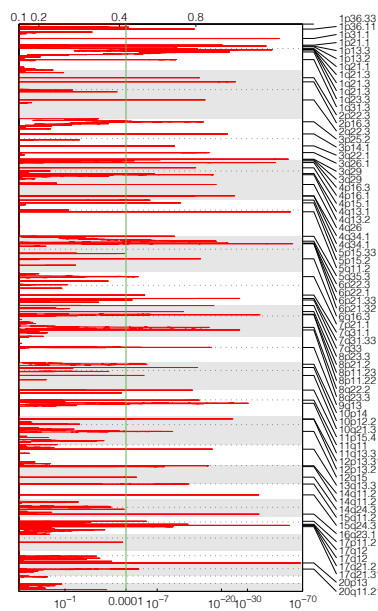**Cluster 2**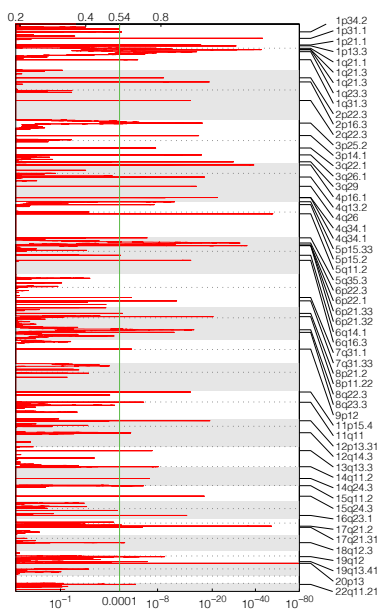**Cluster 3****B****Deletion**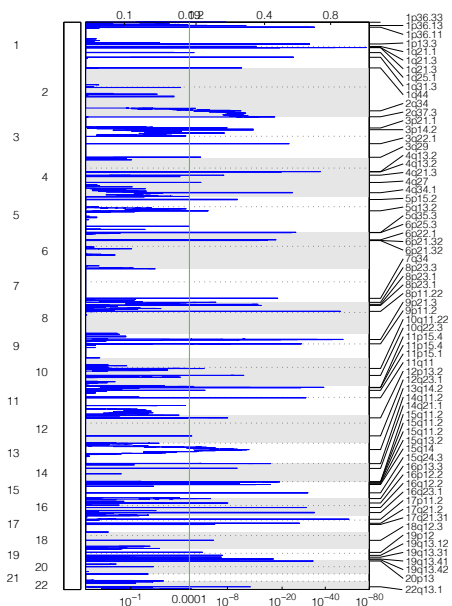**Cluster 1**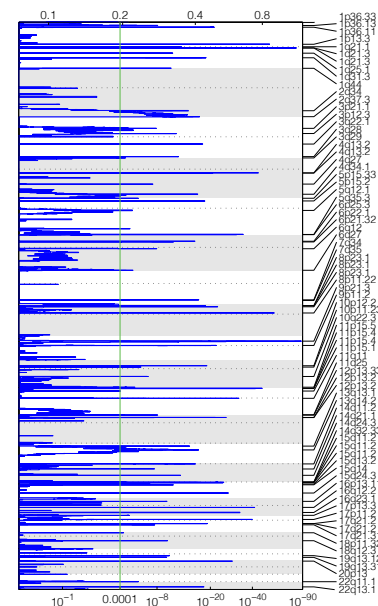**Cluster 2**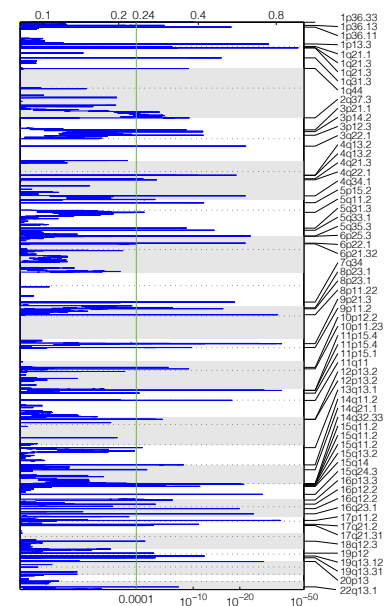**Cluster 3**

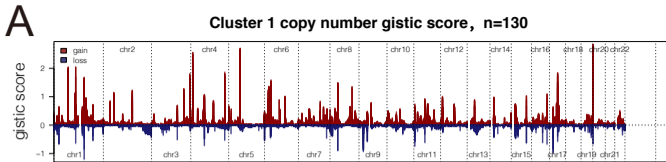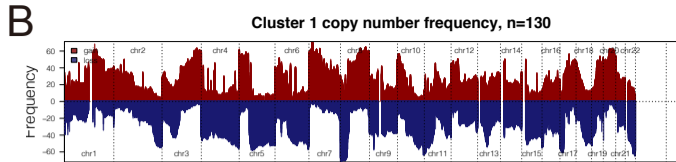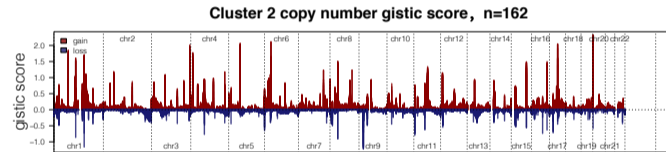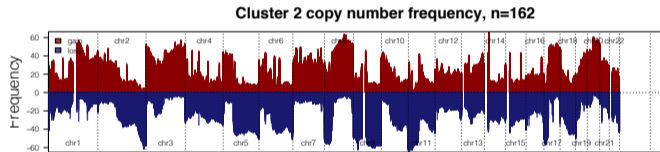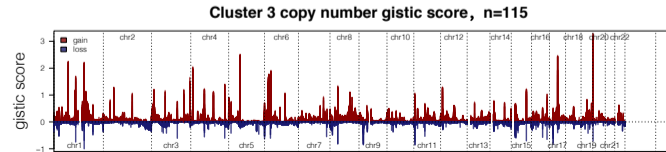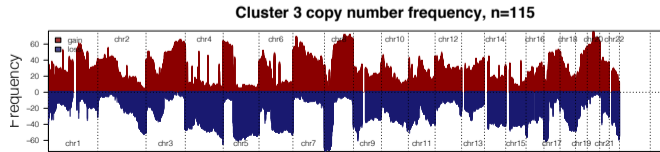

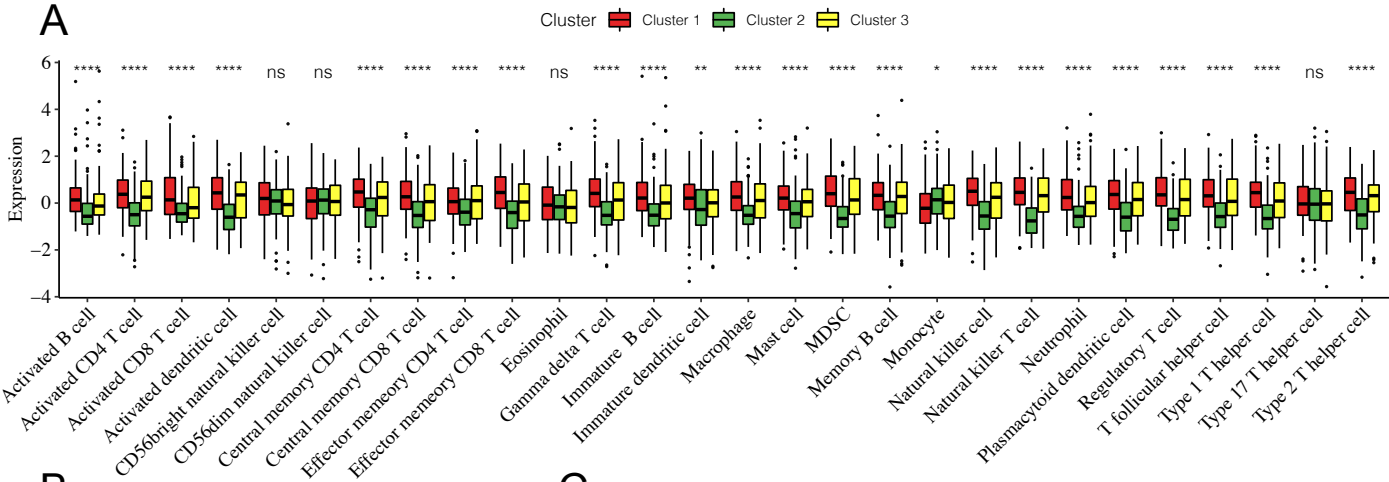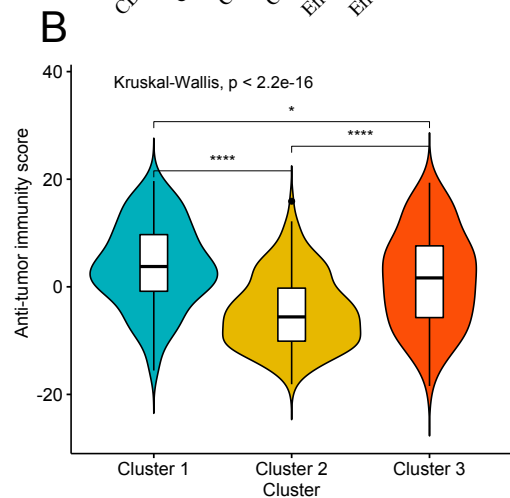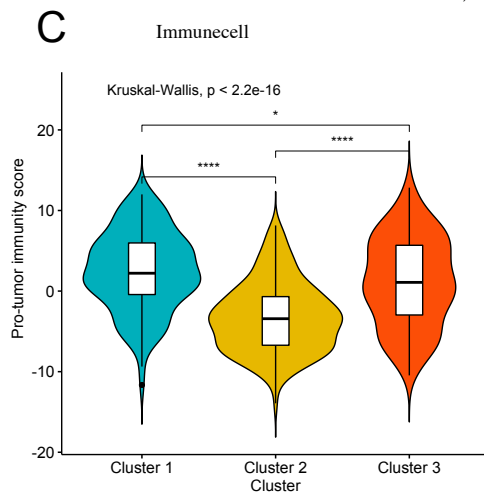

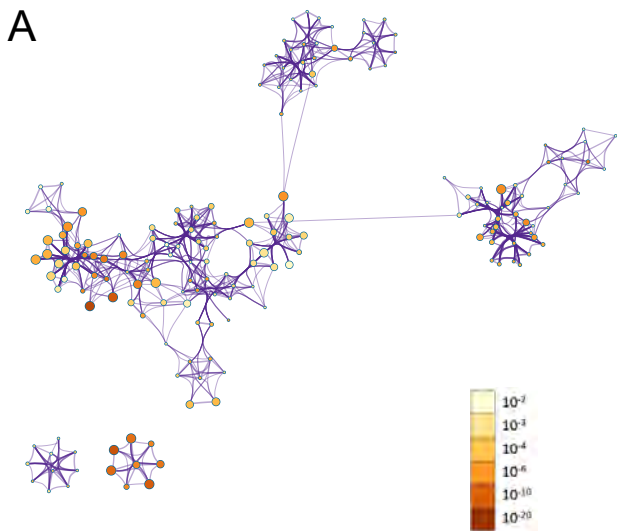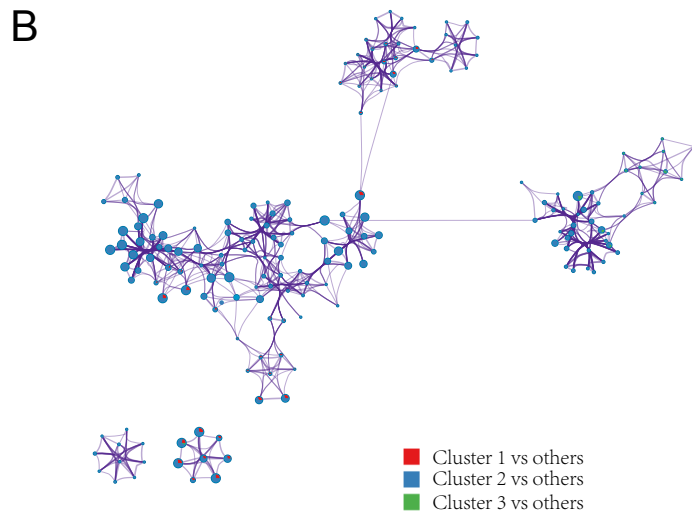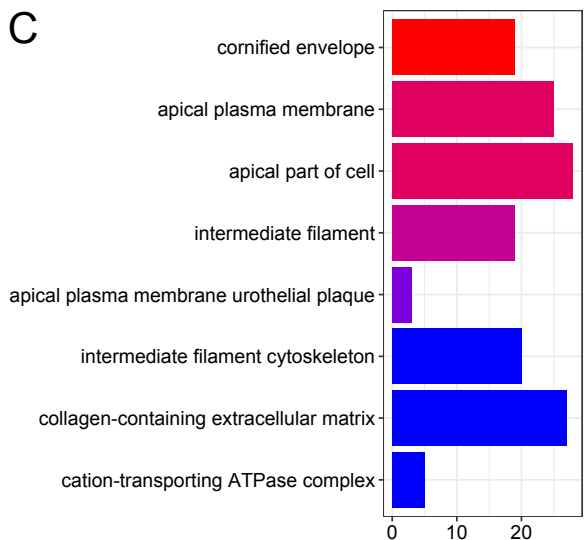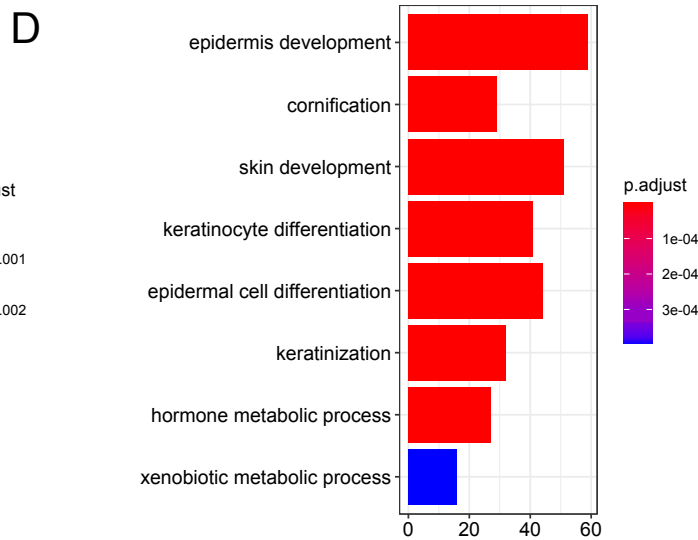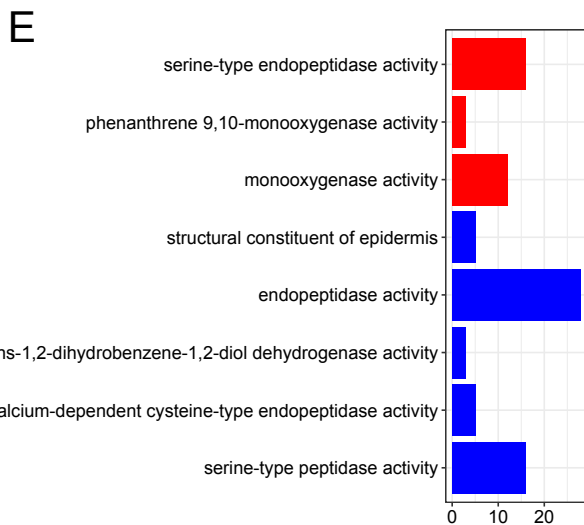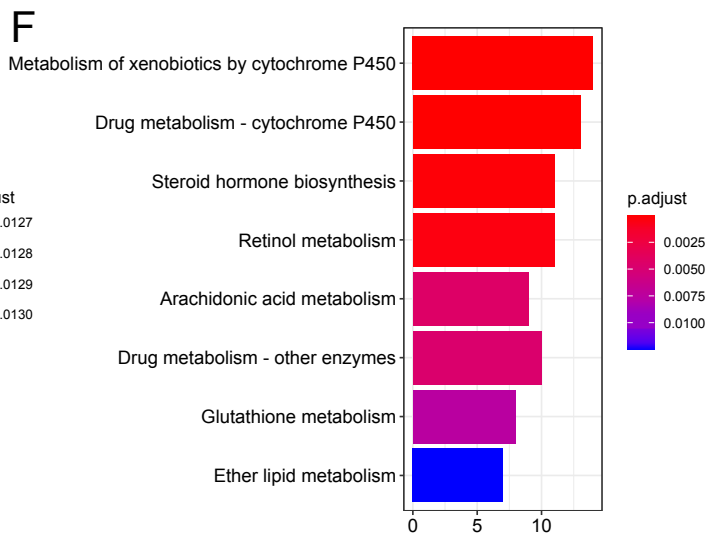

**A**consensus matrix  $k=2$ 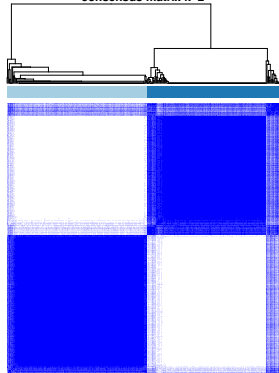**B**consensus matrix  $k=3$ 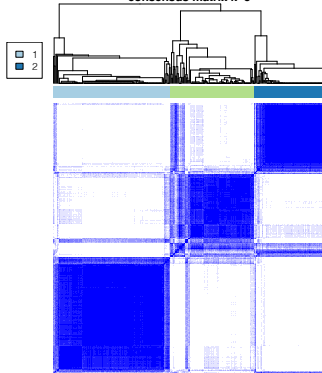**C**consensus matrix  $k=4$ 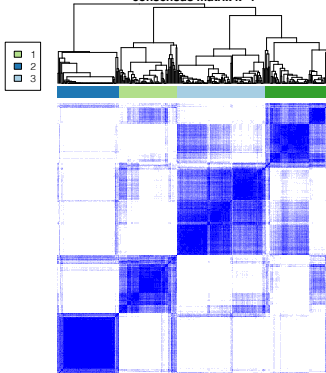**D**consensus matrix  $k=5$ 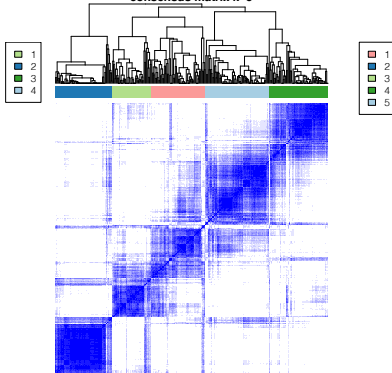

A

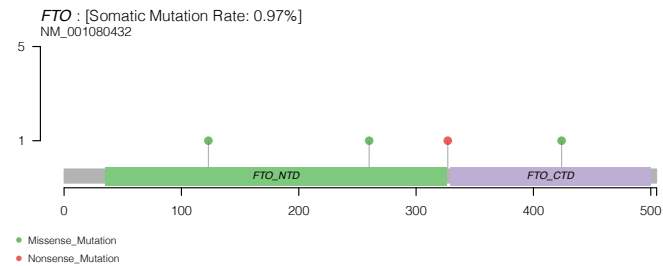

B

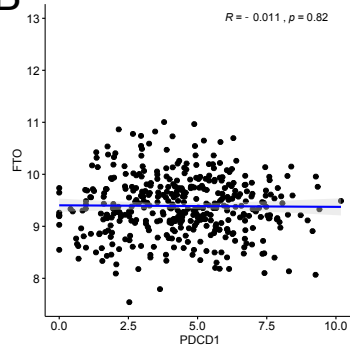

C

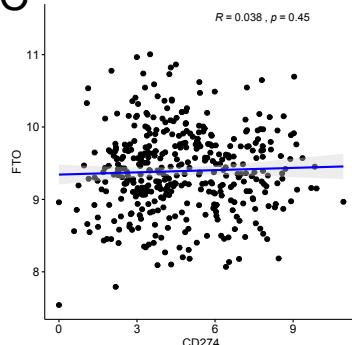

D

FTO Expression Level (log<sub>2</sub> TPM)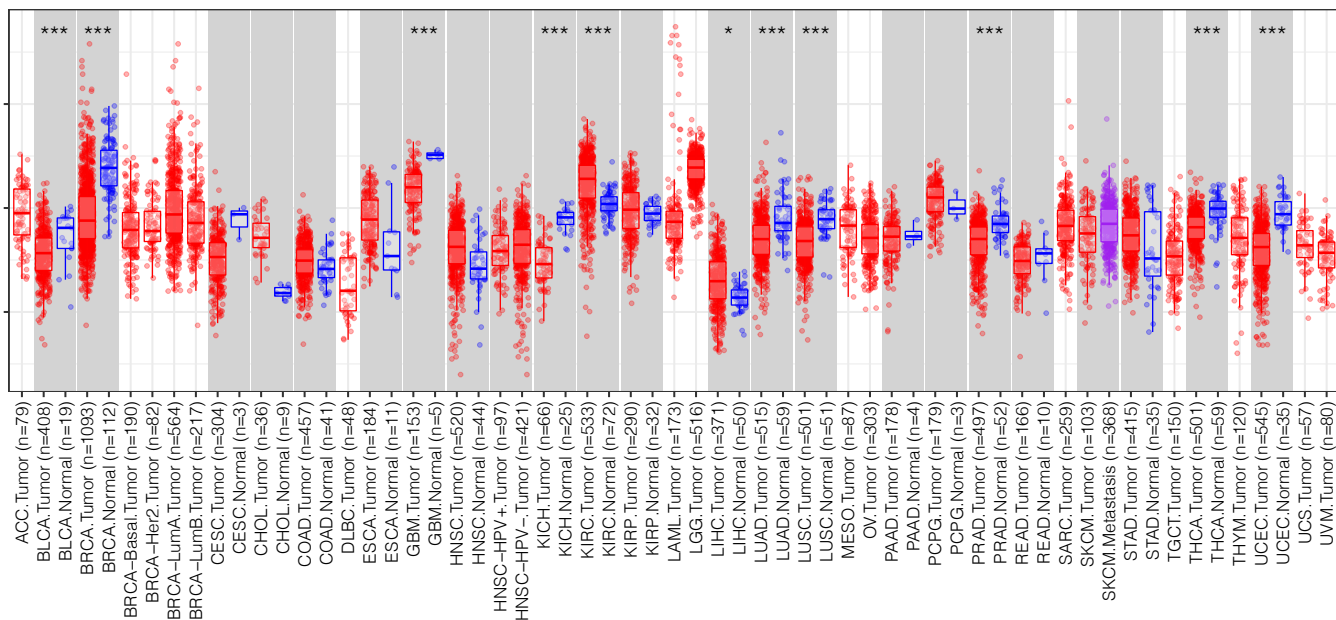

E

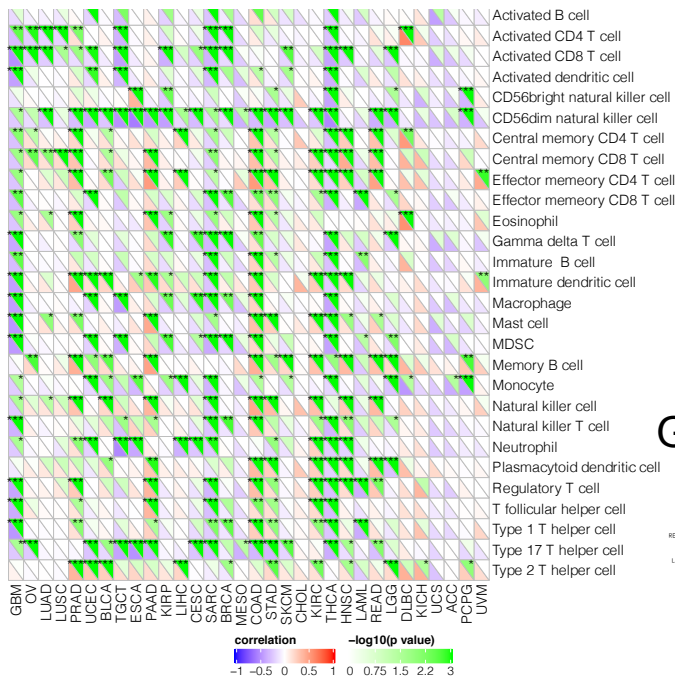

F

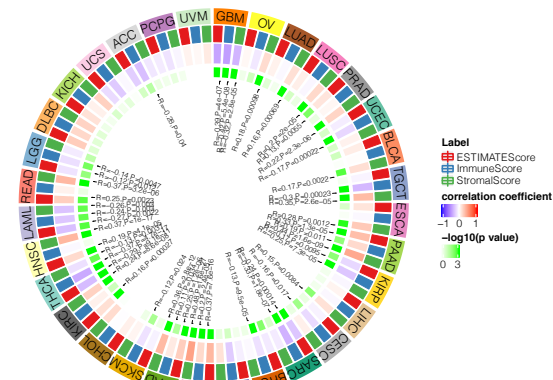

G

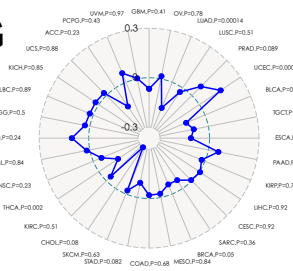

H

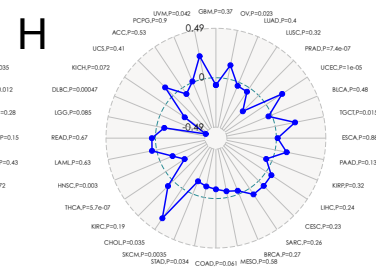

Supplement: Supplementary file [file c8fa1e178b23d1ef1f470d11.pdf]
