# Supplementary material for: Identification and Validation of N6-methyladenosine-related Biomarkers for Bladder Cancer: Implications for Immunotherapy
Source: Research Square preprint supplement (doi:10.21203/rs.3.rs-1101509/v1), 2021-12-06

A

FTO : [Somatic Mutation Rate: 0.97%]  
NM\_001080432

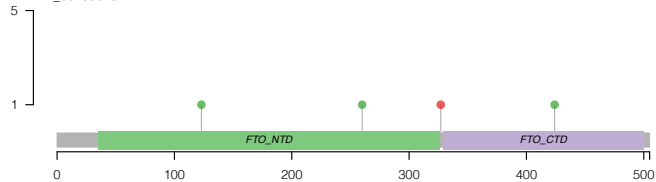

● Missense\_Mutation  
● Nonsense\_Mutation

B

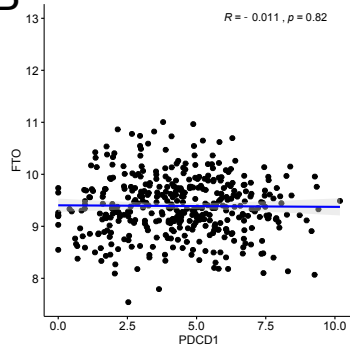

C

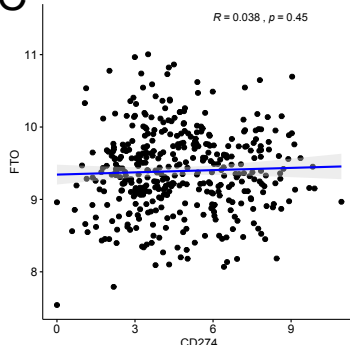

D

FTO Expression Level (log<sub>2</sub> TPM)

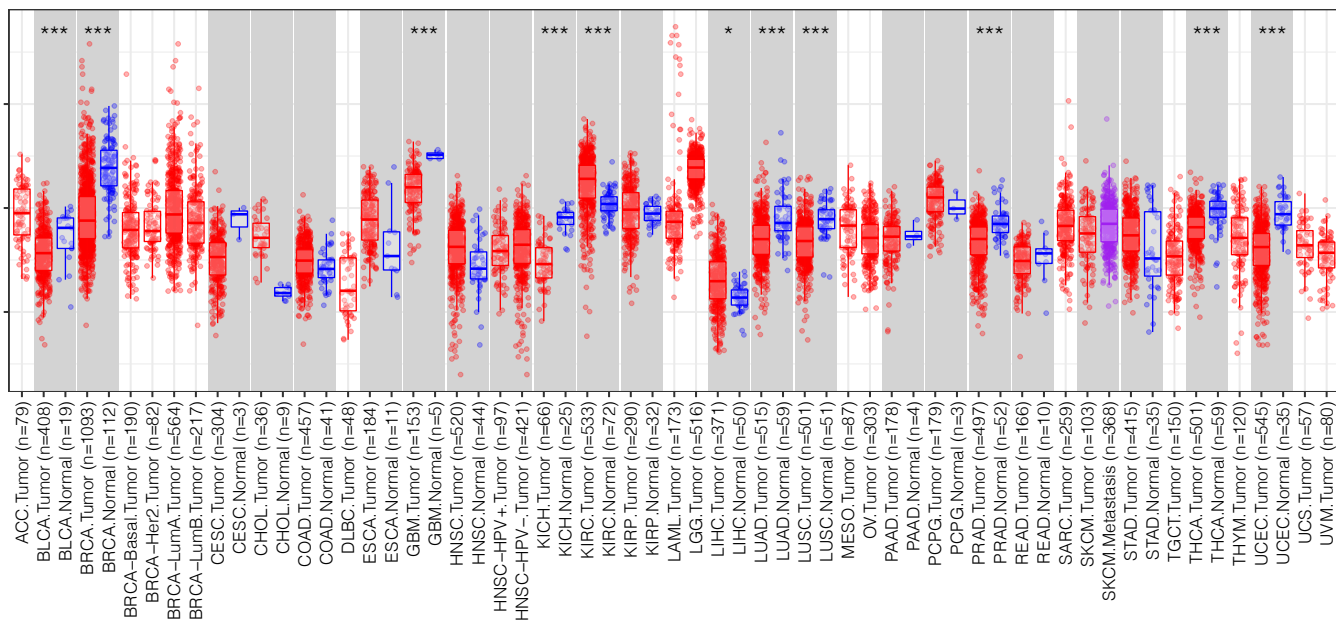

E

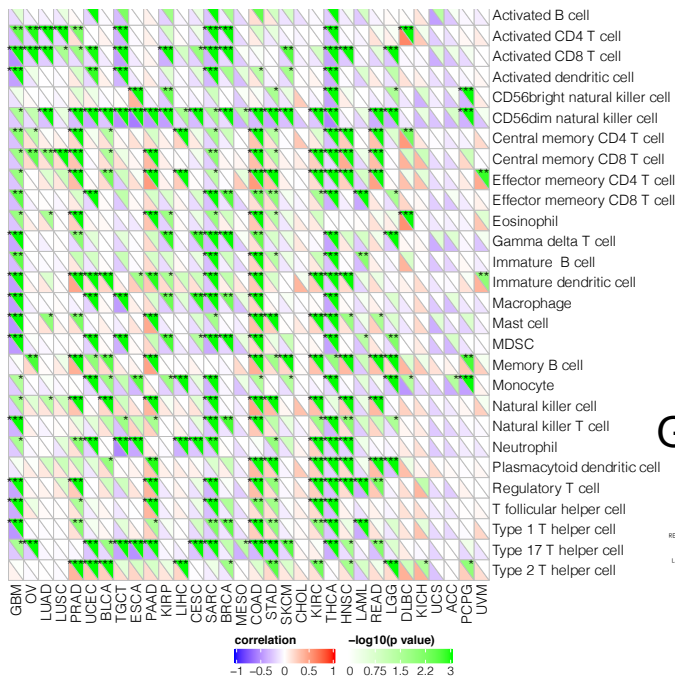

F

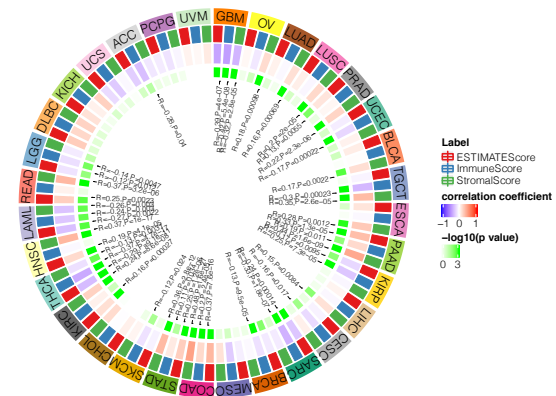

G

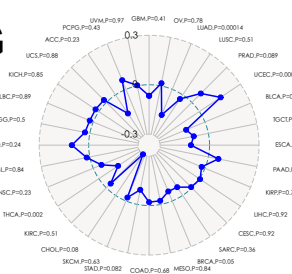

H

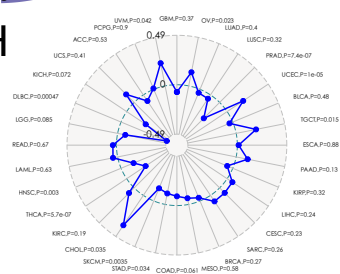

Supplement: Supplementary file 3 [file 68e7f63b5fa89d7e307a2ac0.pdf]
