# Supplementary figures and images for: Identification and Validation of N6-methyladenosine-related Biomarkers for Bladder Cancer: Implications for Immunotherapy
Source: Research Square preprint supplement (doi:10.21203/rs.3.rs-1101509/v1), 2021-12-06

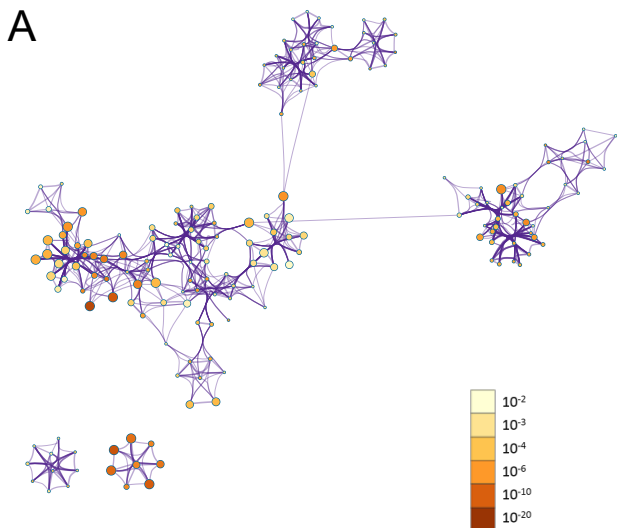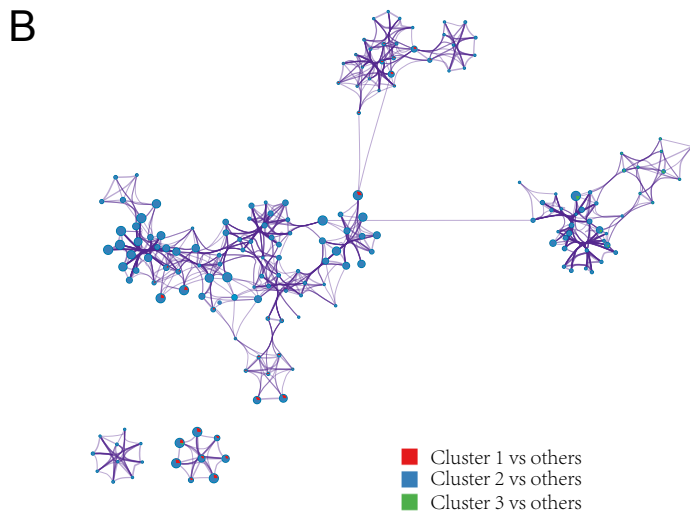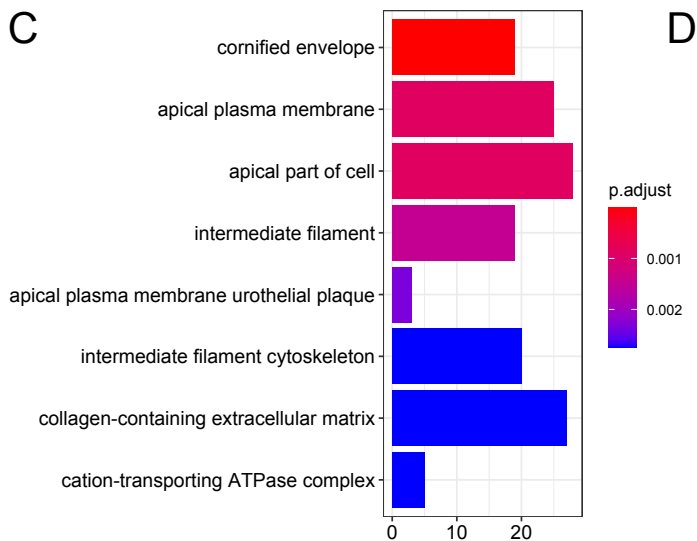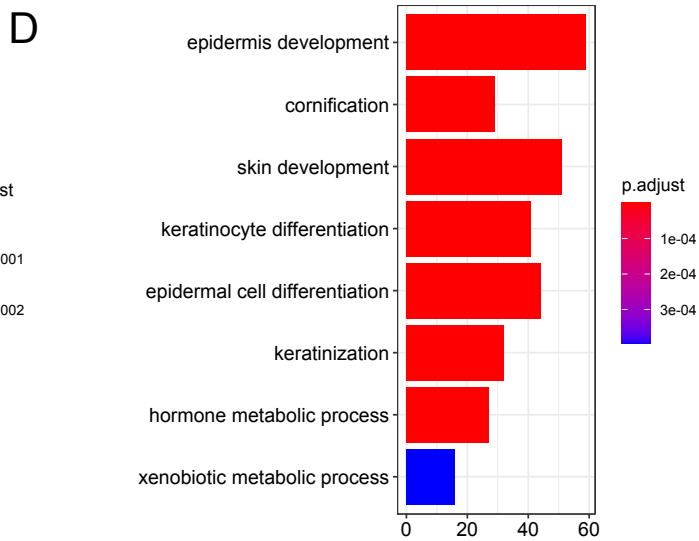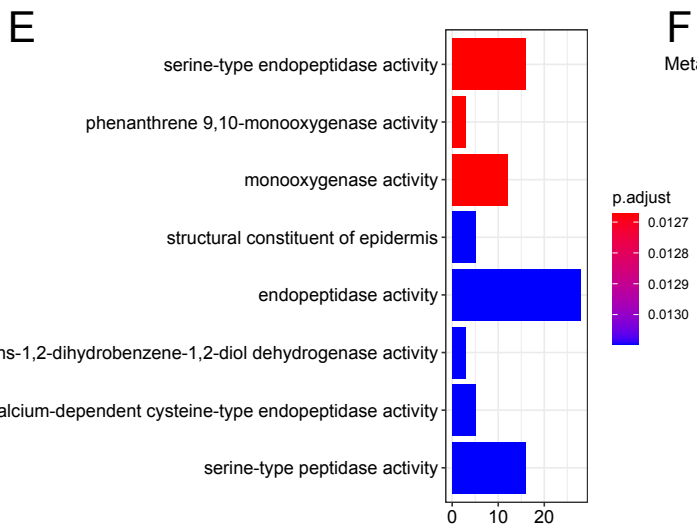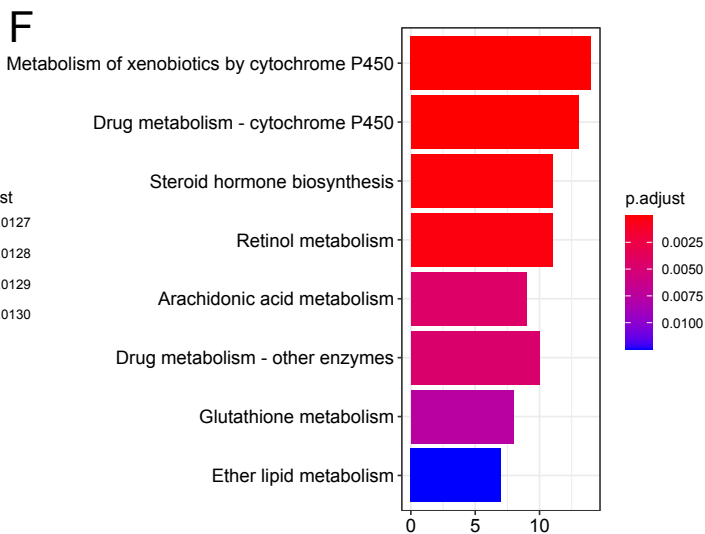

Supplement: Supplementary file 1 [file 024a28e057f7334c7abf3021.pdf]

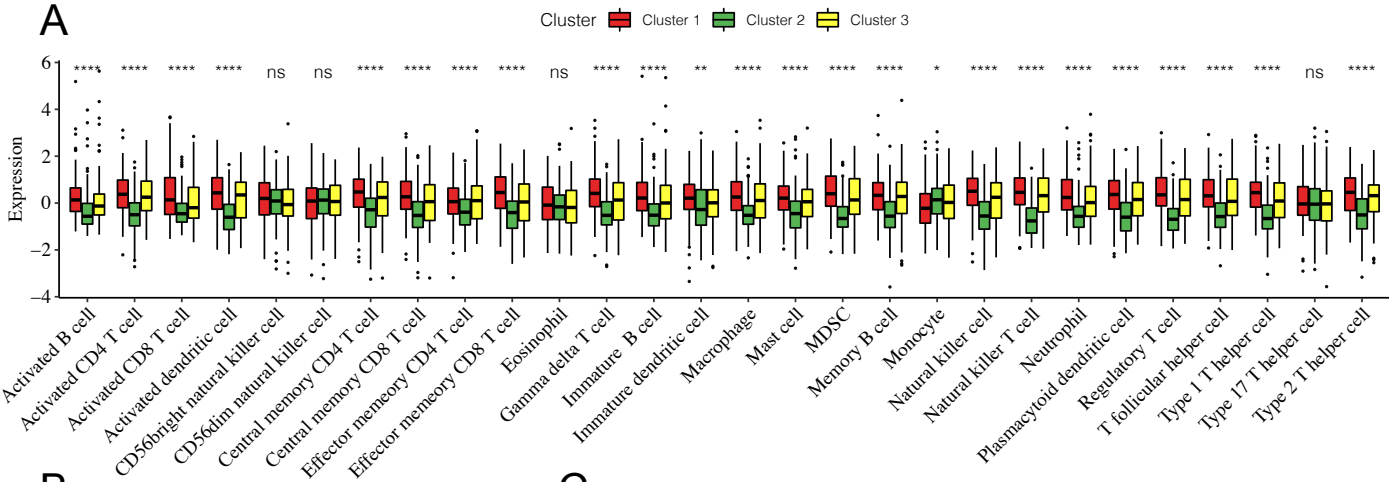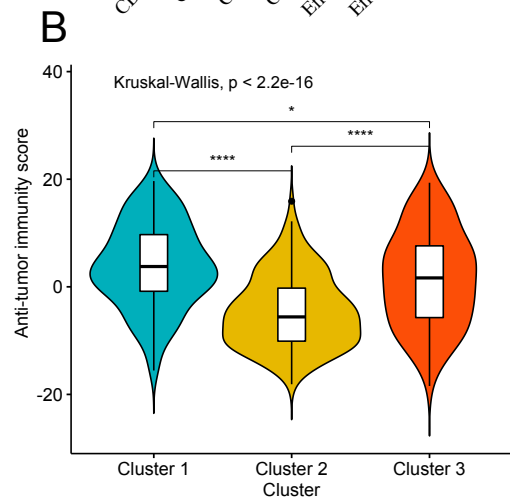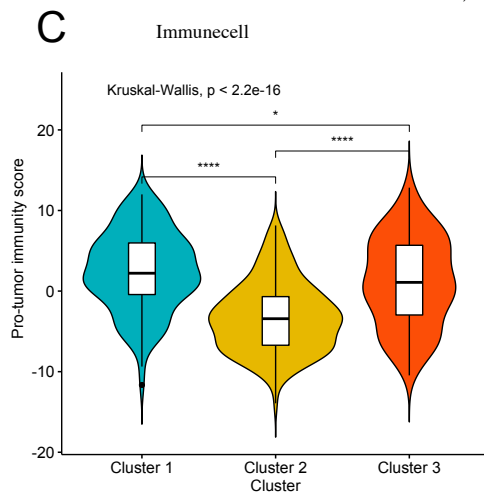

Supplement: Supplementary file 2 [file 126e48d8a0314ffaaae7d430.pdf]

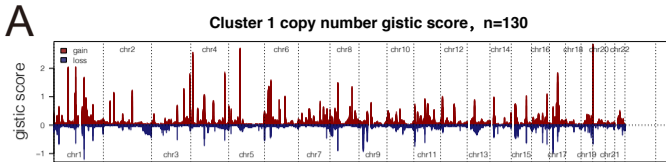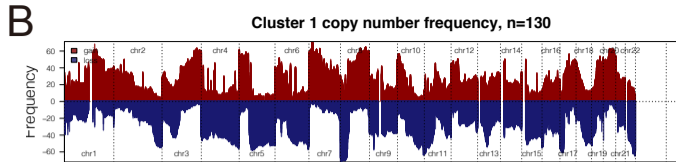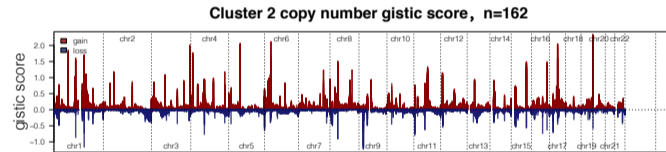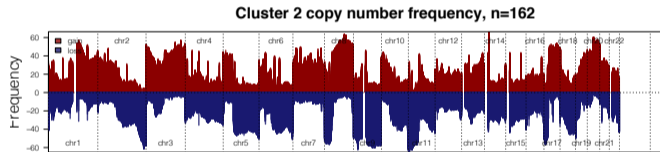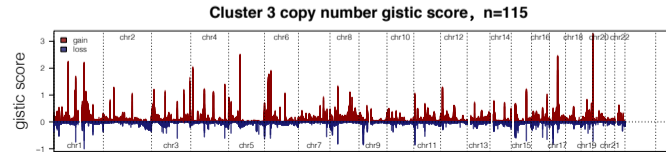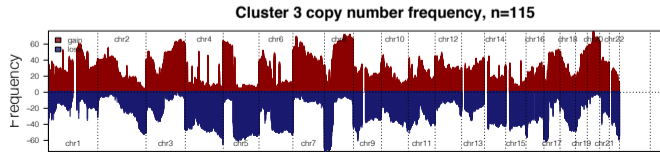

Supplement: Supplementary file 4 [file 9d268dd18293841e810ab912.pdf]

**A****Amplification**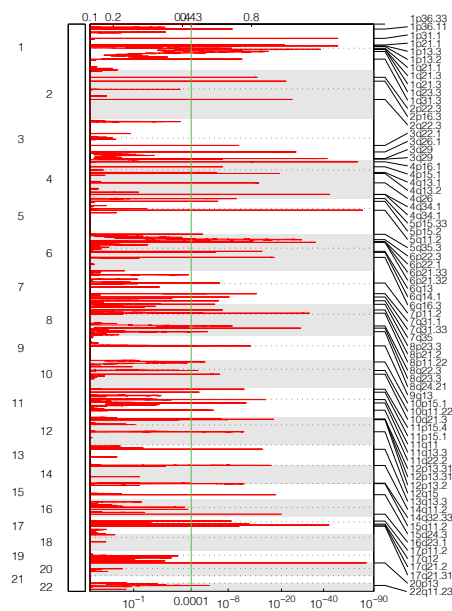**Cluster 1**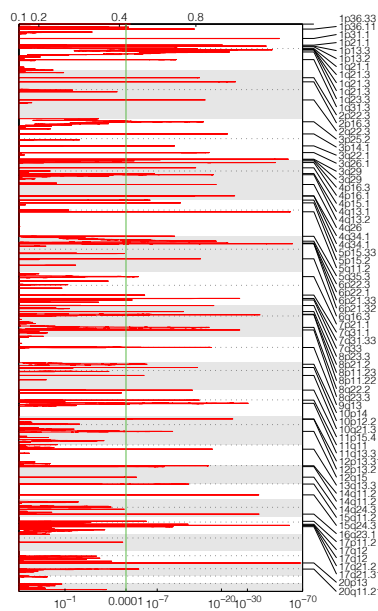**Cluster 2**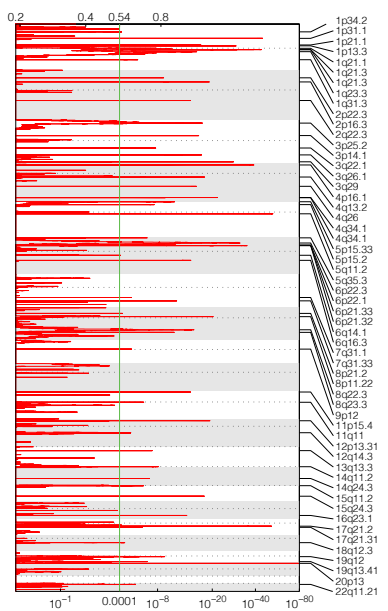**Cluster 3****B****Deletion**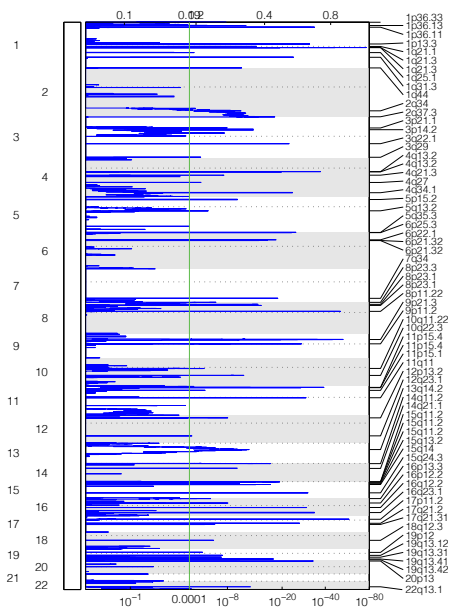**Cluster 1**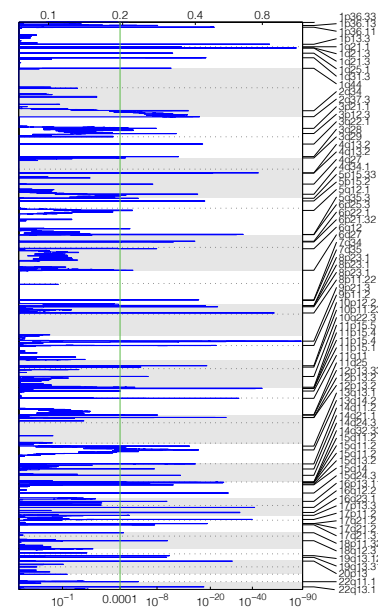**Cluster 2**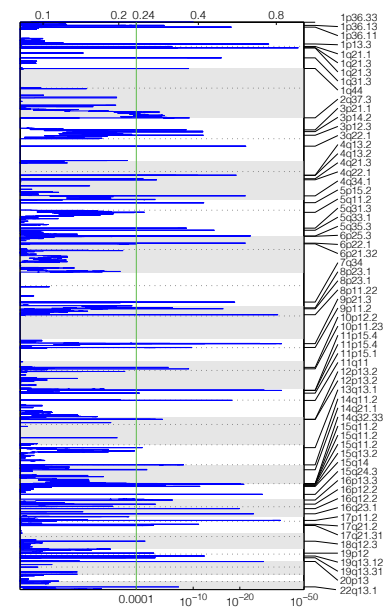**Cluster 3**

Supplement: Supplementary file 5 [file a29f387d24324a06b1802101.pdf]

**A**consensus matrix  $k=2$ 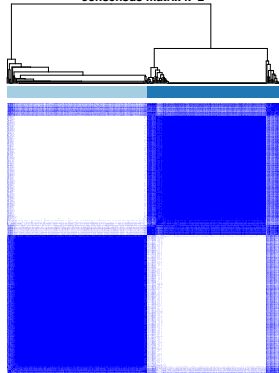**B**consensus matrix  $k=3$ 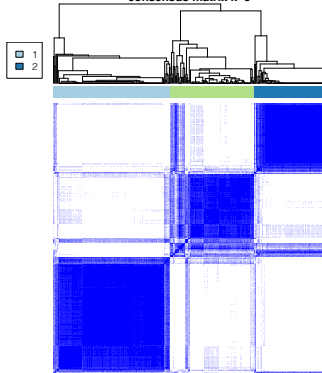**C**consensus matrix  $k=4$ 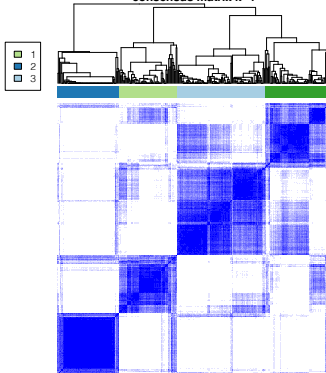**D**consensus matrix  $k=5$ 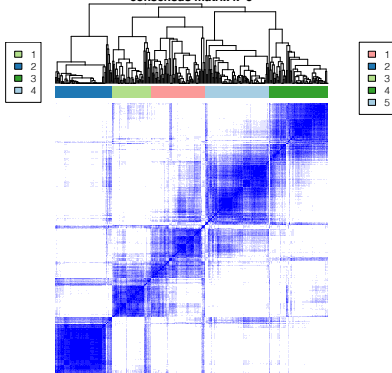

Supplement: Supplementary file 6 [file d3e683ae853a553a356d5b54.pdf]
